# Supplementary material for: Impact of adjuvants on the biophysical and functional characteristics of HIV vaccine-elicited antibodies in humans
Source: PubMed Central journal article supplement (PMC9352797; doi:10.1038/s41541-022-00514-9), 2022-08-04
Supplement: 41541_2022_514_MOESM1_ESM.pdf [file 41541_2022_514_MOESM1_ESM.pdf]

## Supplemental Information

### Impact of adjuvants on the biophysical and functional characteristics of HIV vaccine-elicited antibodies in humans

Shiwei Xu<sup>1</sup>, Margaret C. Carpenter<sup>2</sup>, Rachel L. Spreng<sup>3</sup>, Scott D. Neidich<sup>3</sup>, Sharanya Sarkar<sup>2</sup>, DeAnna Tenney<sup>3</sup>, Derrick Goodman<sup>3</sup>, Sheetal Sawant<sup>3</sup>, Shalini Jha<sup>3</sup>, Brooke Dunn<sup>3</sup>, M. Juliana McElrath<sup>4</sup>, Valerie Bekker<sup>3</sup>, Sarah V. Mudrak<sup>3</sup>, Robin Flinko<sup>5</sup>, George K. Lewis<sup>5</sup>, Guido Ferrari<sup>3</sup>, Georgia D. Tomaras<sup>3</sup>, Xiaoying Shen<sup>3\*</sup>, Margaret E. Ackerman<sup>1,2\*</sup>

<sup>1</sup>Quantitative Biomedical Science Program, Dartmouth College, Hanover, NH USA

<sup>2</sup>Thayer School of Engineering, Dartmouth College, Hanover, NH, USA

<sup>3</sup>Department of Surgery, Duke University School of Medicine, Durham, North Carolina  
Duke Human Vaccine Institute, Duke University Medical Center, Durham, NC, USA

<sup>4</sup>Vaccine and Infectious Disease Division, Fred Hutchinson Cancer Research Center, Seattle, WA, 98109, USA; Departments of Laboratory Medicine and Medicine, University of Washington, Seattle, WA, USA.

<sup>5</sup>Division of Vaccine Research, The Institute of Human Virology, University of Maryland School of Medicine, Baltimore, MD, USA

<sup>^</sup> Co-first authors

<sup>\*</sup>Corresponding authors

Xiaoying Shen  
915 S. LaSalle St. Durham, NC 27710  
[sxshen@duke.edu](mailto:sxshen@duke.edu)  
919 684 9986

Margaret E. Ackerman  
14 Engineering Dr,  
Hanover, NH 03755  
[margaret.e.ackerman@dartmouth.edu](mailto:margaret.e.ackerman@dartmouth.edu)  
603 646 9922

| <b>Supplemental Figures</b> |                                                         |
|-----------------------------|---------------------------------------------------------|
| Supplemental Figure 1       | Longitudinal profile of SF2-specific antibody functions |
| Supplemental Figure 2       | Longitudinal profile of SF-2-specific antibodies        |
| <b>Supplemental Tables</b>  |                                                         |
| Supplemental Table 1        | Antigens used in BAMA/BAMA-AI and Fc Array Assays       |

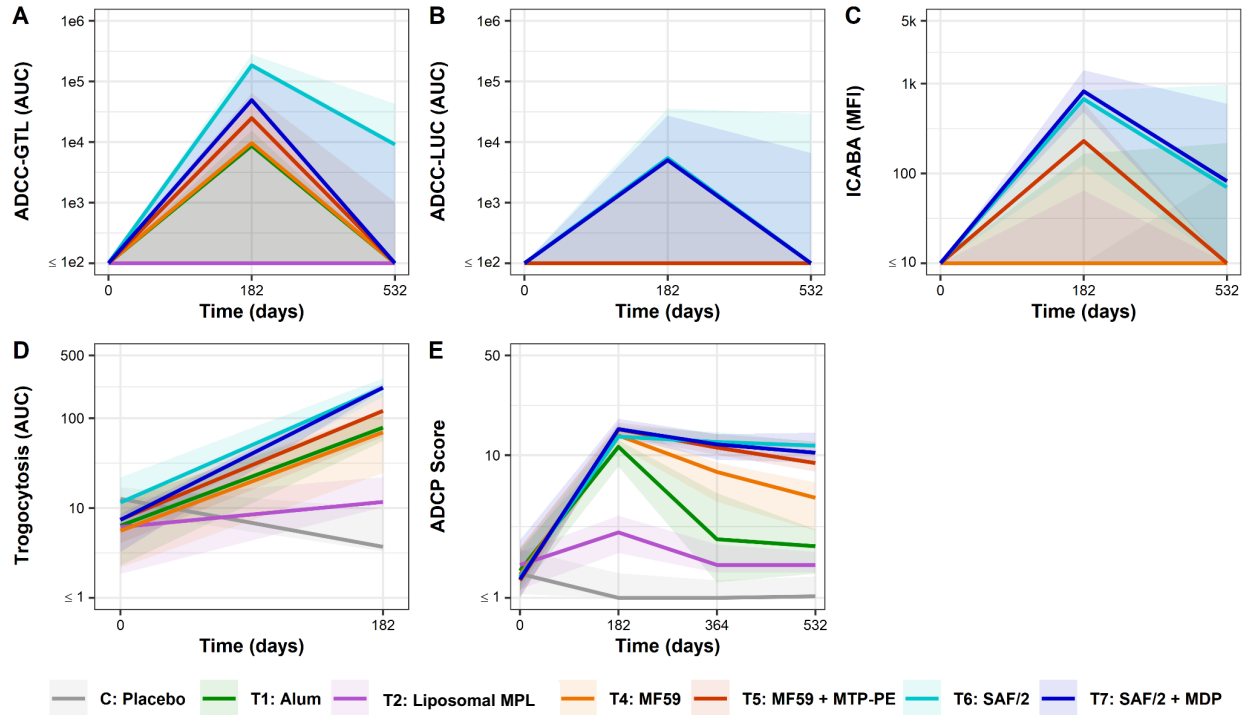

**Supplemental Figure 1. Longitudinal profile of SF2-specific antibody functions.** Antibody dependent cellular cytotoxicity GranToxiLux (ADCC-GTL) area under the curve (AUC) (**A**), Antibody dependent cellular cytotoxicity Luciferase (ADCC-LUC) area under the curve (AUC) (**B**), Infected Cell Antibody Binding Activity (ICABA) in mean/median fluorescence intensity (MFI) (**C**), Trogocytosis AUC (**D**), and Antibody-dependent cellular phagocytosis (ADCP) score (**E**) over time. Solid lines depict median response over time, and the shaded regions represent the interquartile range (25<sup>th</sup> percentile to 75<sup>th</sup> percentile), colored by treatment arm.

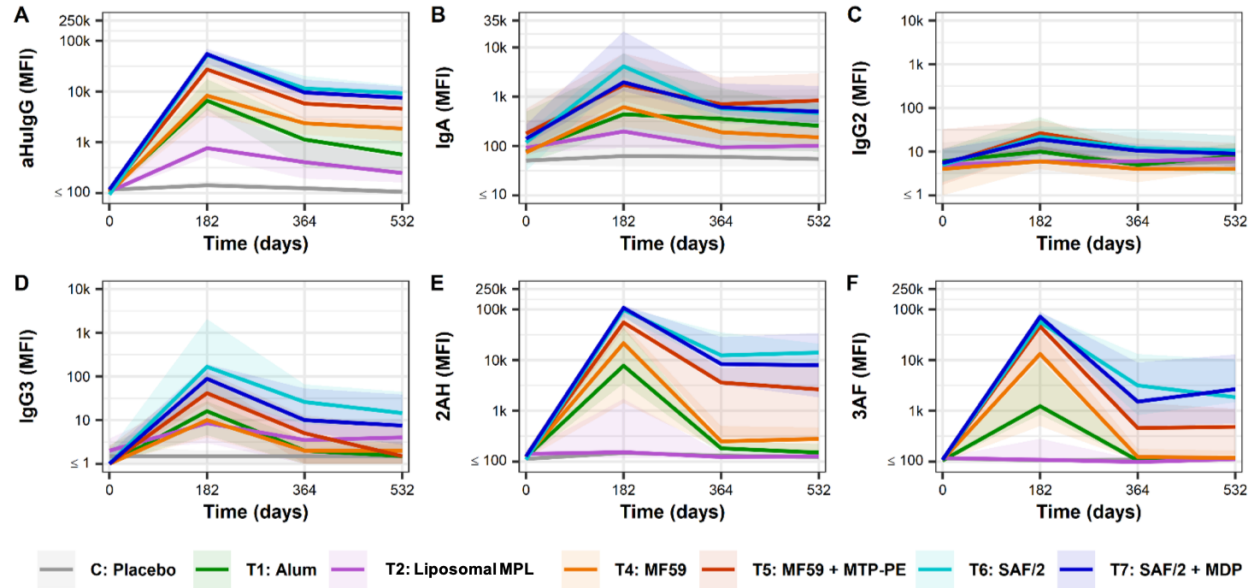

**Supplemental Figure 2. Longitudinal profile of SF-2-specific antibodies.** Fc Array characterization of antibodies raised against SF-2 gp120 across subclass (**A-D**) and Fc $\gamma$  receptor binding (**E-F**) over time. Solid lines depict median response over time, and the shaded regions represent the interquartile range (25<sup>th</sup> percentile to 75<sup>th</sup> percentile), colored by treatment arm.

**Supplemental Table 1: Antigens used in BAMA/BAMA-AI and Fc Array Assays.**

| V1V2 gp70/Tags                   | gp140                          | gp120                         | V3 and Others            |
|----------------------------------|--------------------------------|-------------------------------|--------------------------|
| <b>BAMA/BAMA-AI</b>              |                                |                               |                          |
| gp70-001428.2.42 V1V2            | A1.con.env03 140 CF            | A244 D11gp120 avi             | B.MN V3 gp70             |
| gp70-191084_B7 V1V2              | AE.01.con_env03<br>gp140CF avi | B.63521_D11gp120/293F         | Bio-V3.A                 |
| gp70-700010058 V1V2              | BF1266_gp140C.avi/293F         | BJOX002_D11gp120.avi/293F     | Bio-V3.B                 |
| gp70-7060101641 V1V2             | Con S gp140 CF1                | BORI D11gp120.avi/293F        | Bio-V3.C                 |
| gp70-96ZM651.02 V1v2             | RHPA4259_C7.gp140C.avi         | CNE20_D11gp120.avi/293F       | Bio-V3.CRF1              |
| gp70-BF1266_431a V1V2            | SC42261_gp140.avi/293F         | TT31P.2792_D11gp120.avi/293F  | Bio-V3.CRF2              |
| gp70-BJOX002000.03.2 V1V2        | WITO4160.gp140C.avi            | TV1c8_D11gp120.avi/293F       | Bio-V3.M                 |
| gp70-C2101.c01 V1V2              | 00MSA 4076 gp140               | 1086C D7gp120.avi/293F        | HxB2 new 8b core 6x His  |
| gp70-CAP210.2.00.E8 V1V2         | 1086C gp140C_avi               | 254008_D11gp120.avi/293F      | RSC3                     |
| gp70-CM244.ec1 V1V2              |                                | 51802_D11gp120.avi/293F       | YU2 gp120 old core       |
| gp70-RHPA4259.7 V1V2             |                                | 96ZM651.D11gp120.avi          | YU2 gp120 WT             |
| gp70-TT31P.2F10.2792 V1V2        |                                |                               | HxB2 new 8b core 1420R   |
| gp70-TV1.21 V1V2                 |                                |                               | RSC3 delta371            |
| gp70_B.CaseA_V1_V2               |                                |                               | RSC3 delta371/P363N      |
| AE.A244 V1V2 tags                |                                |                               | YU2 gp120 1420R          |
| AE.A244 V1V2 Tags/293F           |                                |                               | YU2 gp120 old core D368R |
| C.1086C V1_V2 Tags               |                                |                               |                          |
| <b>Fc array</b>                  |                                |                               |                          |
| CaseA2 gp70 V1V2                 | B.6240 gp140<br>gp140C/293F    | 620345_D11<br>gp120.avi/293F  |                          |
| Ce704010042_2E5 gp70-V1V2        | C3347_11 gp140C.avi            | Q769_D11 gp120.avi/293F       |                          |
| 7060101641A7 gp70-V1V1           | CNE5.gp140C.avi.293F           | 62357_D11 gp120.avi/293F      |                          |
| REJO4541.67 gp70-V1V2            | QH0515.gp140C.avi              | BJOX028_D11<br>gp120.avi/293F |                          |
| gp70 scaffold (control) WT       |                                | C.089_D11 gp120/293F          |                          |
|                                  |                                | gp120 JRCSF                   |                          |
|                                  |                                | gp120 PVO                     |                          |
|                                  |                                | CAP45_D11<br>gp120.avi/293F   |                          |
| <b>BAMA/BAMA-AI and Fc array</b> |                                |                               |                          |
| gp70-62357.14 V1V2               | C.CH505TF_gp140/293F           | B.6240_D11gp120/293F          |                          |
| gp70-Ce1086_B2 V1V2              | 9004S.gp140C.avi               | SF2 gp120                     |                          |
